# Supplementary material
Source: Springer Nature journal article supplement (https://www.springermedizin.de/resource/supplementary/12936_2009_1060_MOESM1_ESM.pdf/9548886)

Reduction in risk of defined endpoint

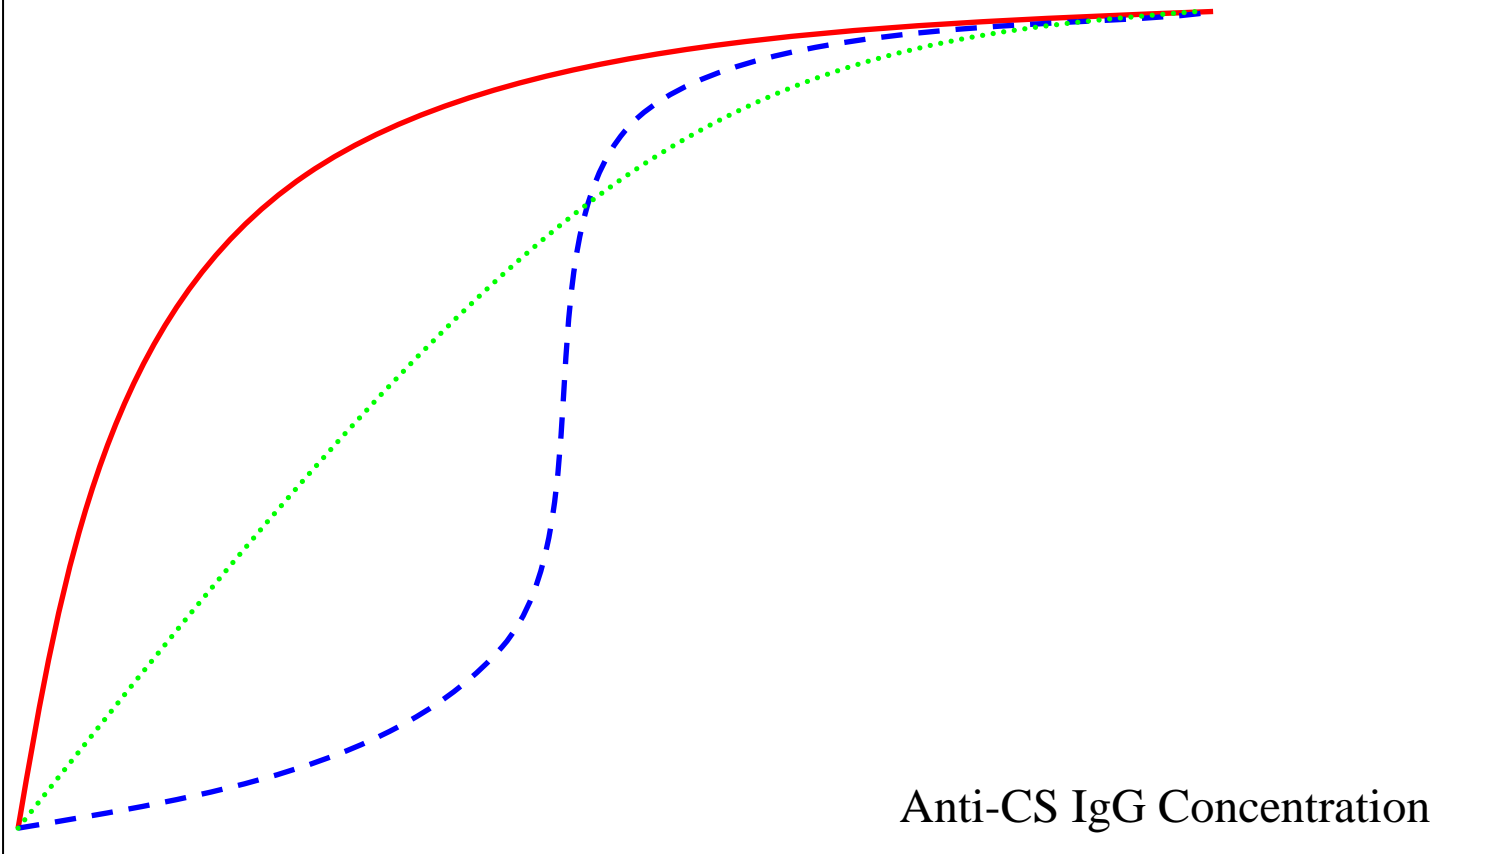

Anti-CS IgG Concentration

Supplement: MOESM1 [file 9548886]
